# Supplementary material
Source: MDPI journal article supplement (https://www.mdpi.com/2073-445X/11/9/1410)
Supplement: s1 [file s1]

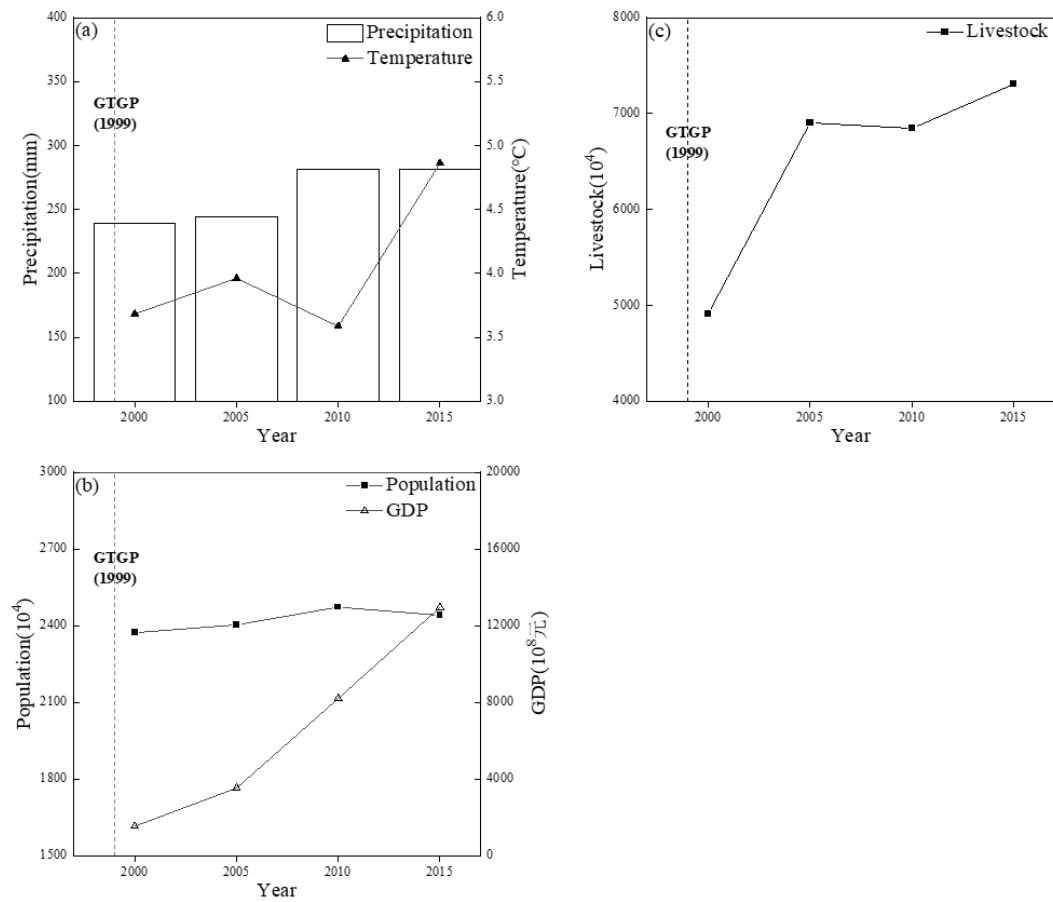

**Figure S1.** Inter-annual variability of (a) precipitation and temperature, (b) population and GDP, and (c) livestock in the study area from 2000 to 2015.

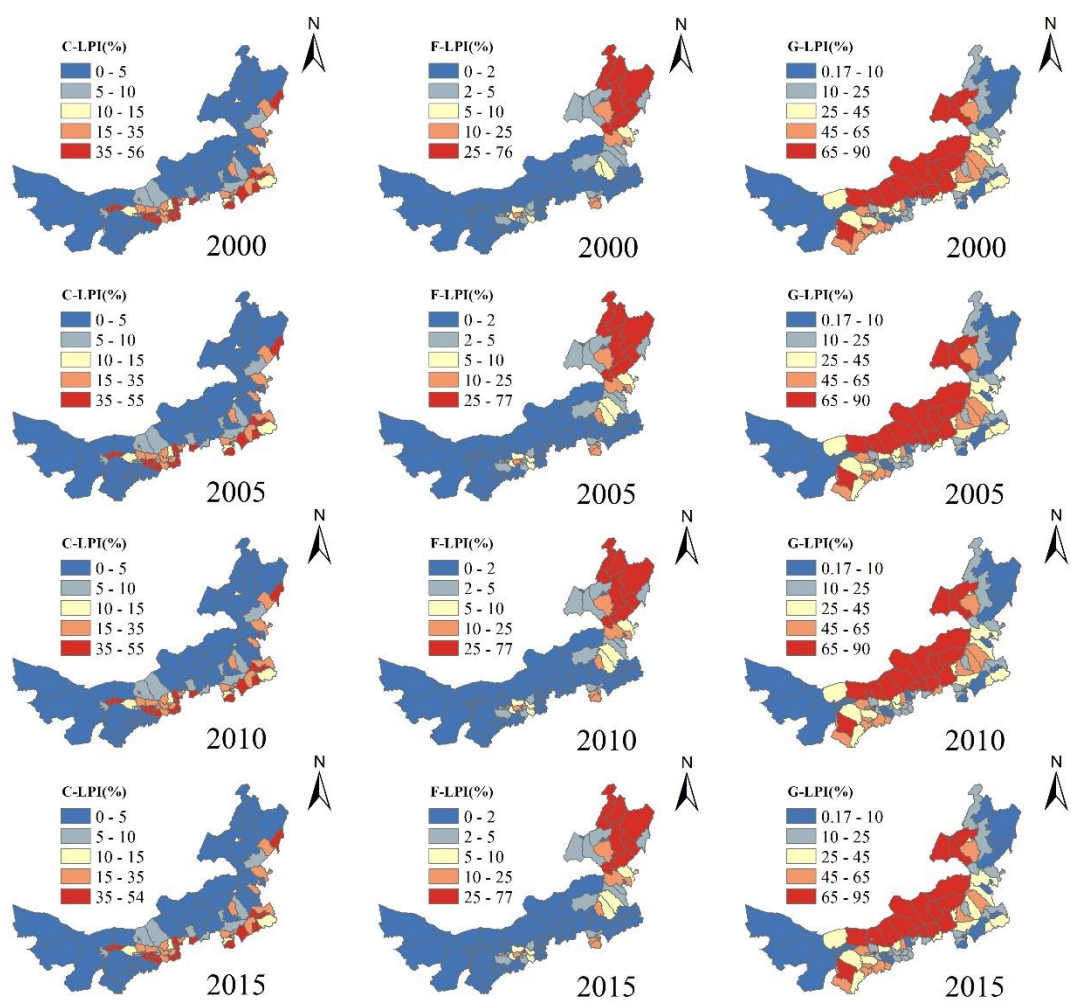

**Figure S2.** The spatio-temporal evolution of LPI in Inner Mongolia from 2000 to 2015. Note: C, cropland; F, forestland; G, grassland.

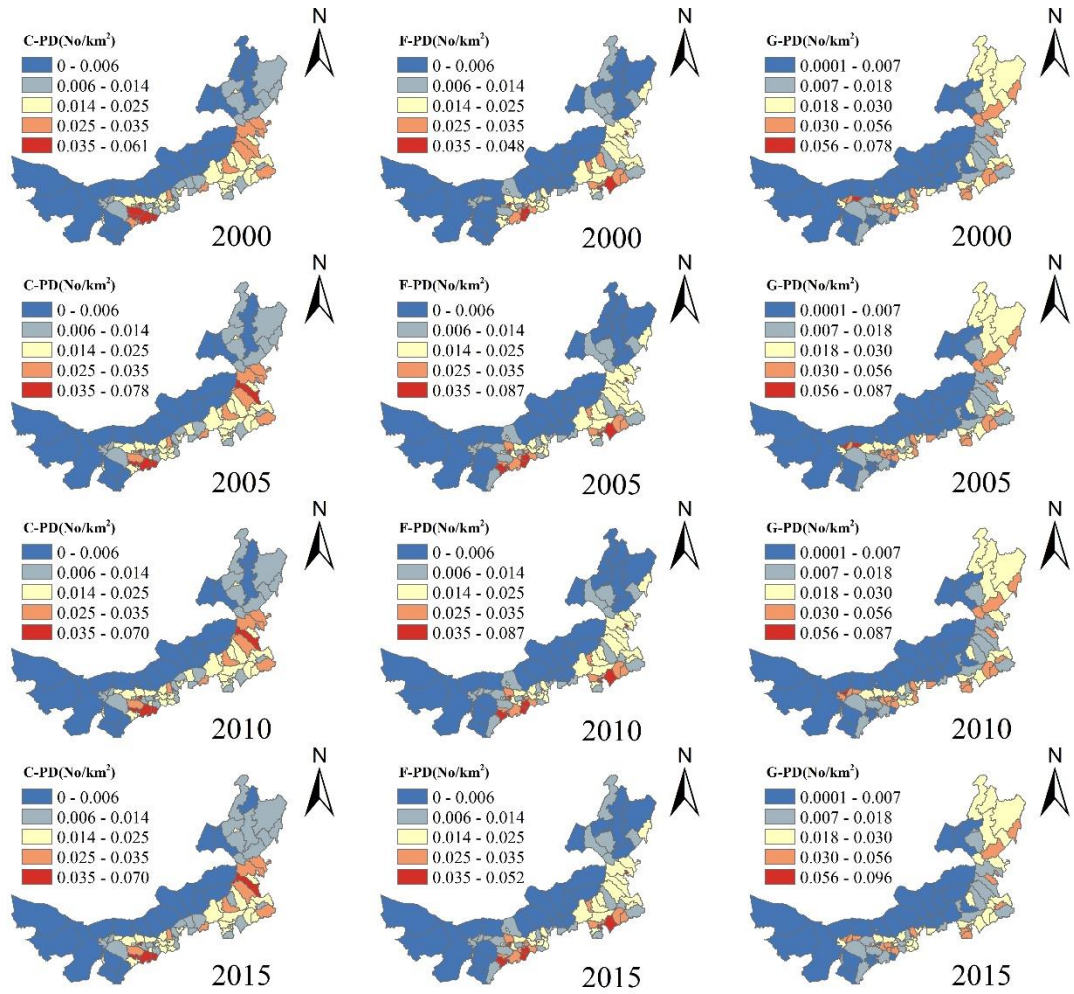

**Figure S3.** The spatio-temporal evolution of PD in Inner Mongolia from 1995 to 2020.  
Note: C, cropland; F, forestland; G, grassland.

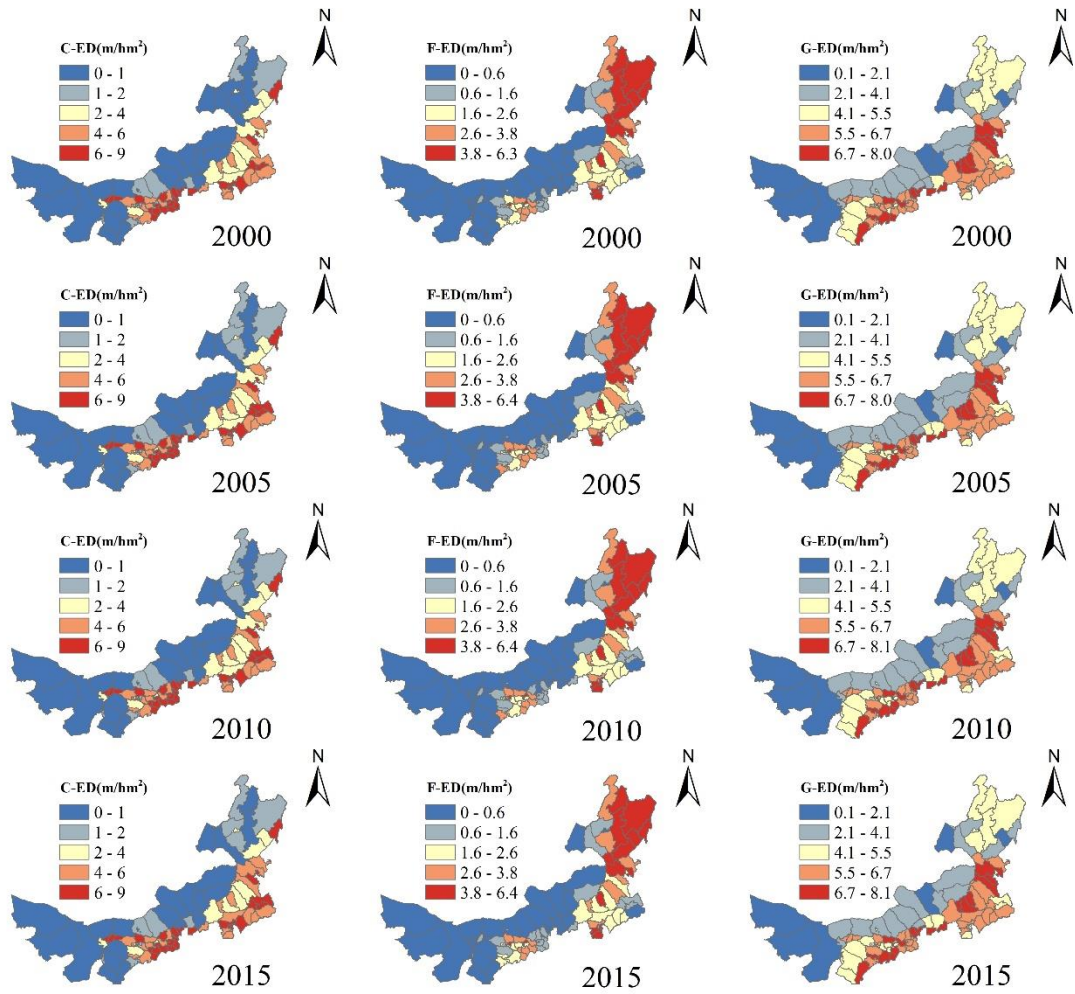

**Figure S4.** The spatio-temporal evolution of ED in Inner Mongolia from 1995 to 2020. Note: C, cropland; F, forestland; G, grassland.

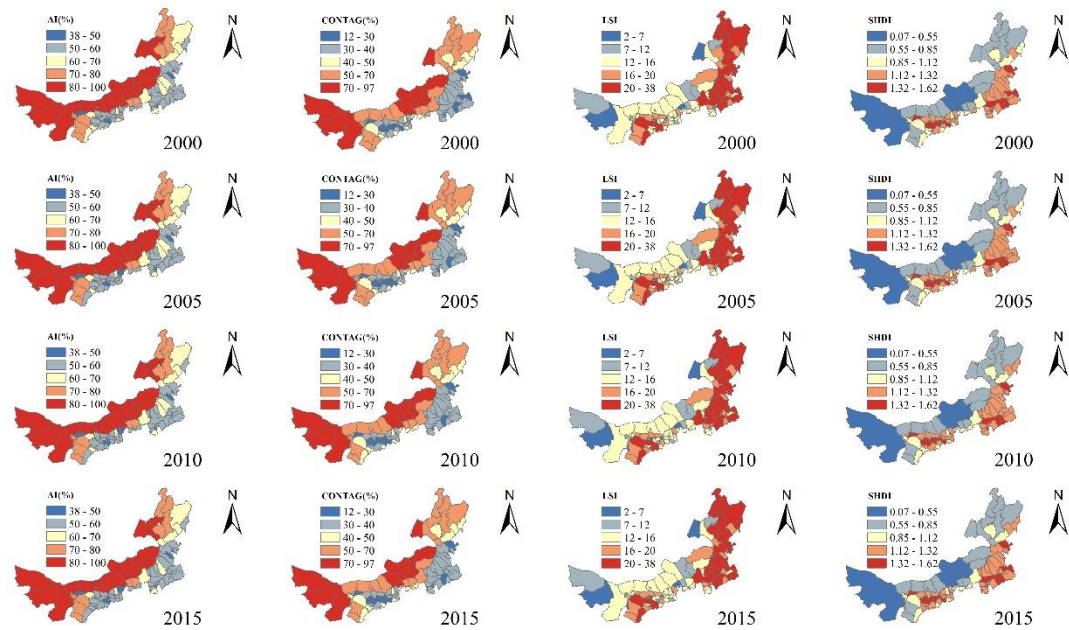

**Figure S5.** The spatio-temporal evolution of landscape metrics at the landscape level in Inner Mongolia from 2000 to 2015.
